# Supplementary material for: Structures and pure near-infrared photophysics of erbium and ytterbium(iii) complexes incorporating fluorinated β-diketone and neutral unidentate ligands
Source: Royal Society of Chemistry journal article supplement (doi:10.1039/d0nj02059a), 2020-01-01
Supplement: d0nj02059a1.pdf [file d0nj02059a1.pdf]

## Supplementary information

### Structures and pure near-infrared photophysics of erbium and ytterbium (III) Complexes incorporating fluorinated $\beta$ -diketone and neutral unidentate ligands

Zubair Ahmed<sup>a</sup>, Kuldeep Mahiya<sup>b</sup> and Khalid Iftikhar<sup>a\*</sup>

<sup>a</sup>Lanthanide Research Laboratory, Department of Chemistry, Jamia Millia Islamia University, New Delhi 110 025, India.

<sup>b</sup>Department of Chemistry, F G M Government College, Adampur, Mandi Adampur, Hisar-125052, Haryana, India

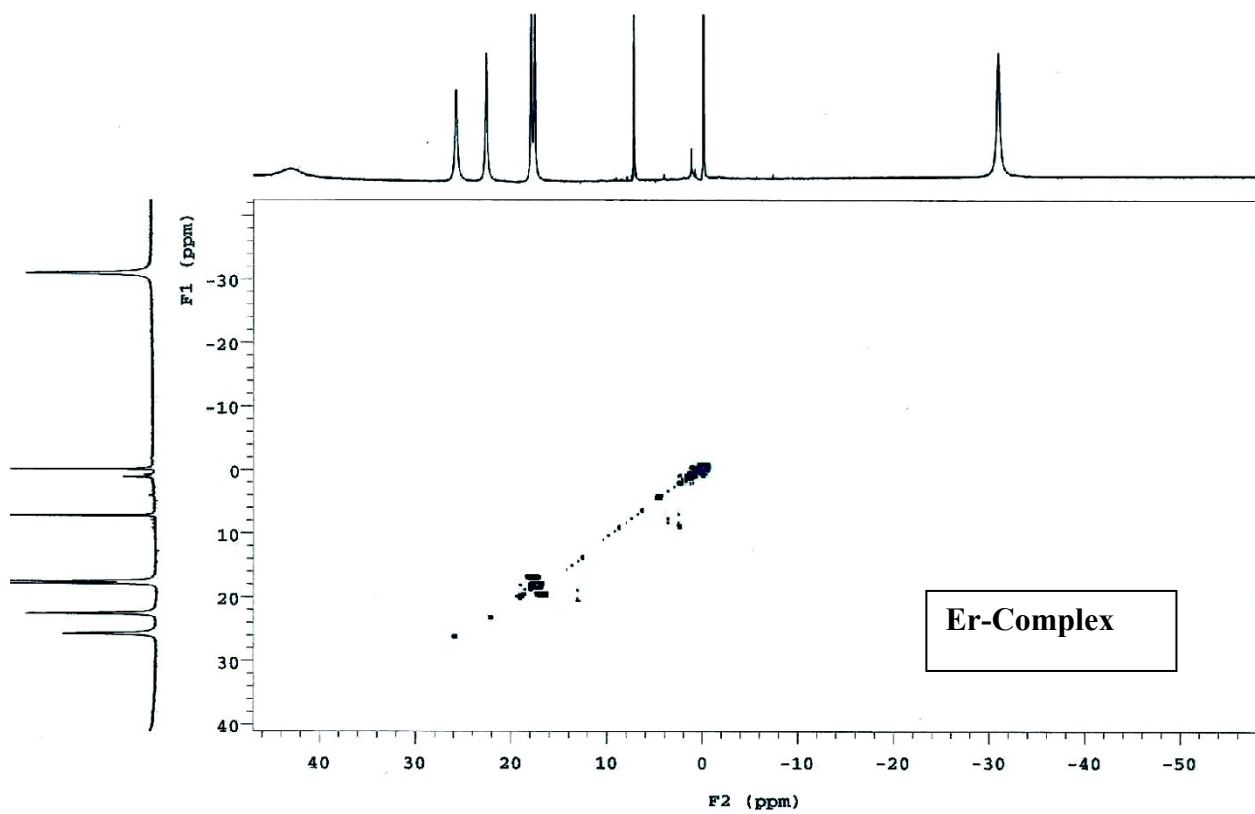

Figure S1. COSY-NMR spectrum of the Er complex.

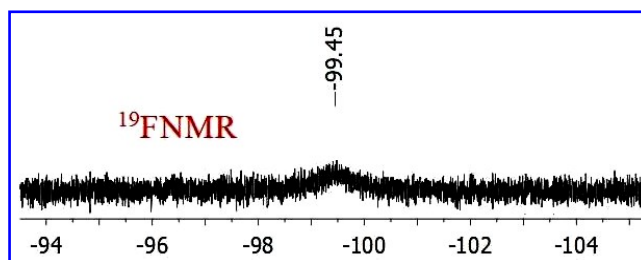

Figure S2.  $^{19}\text{F}$  NMR spectrum of the Er complex.

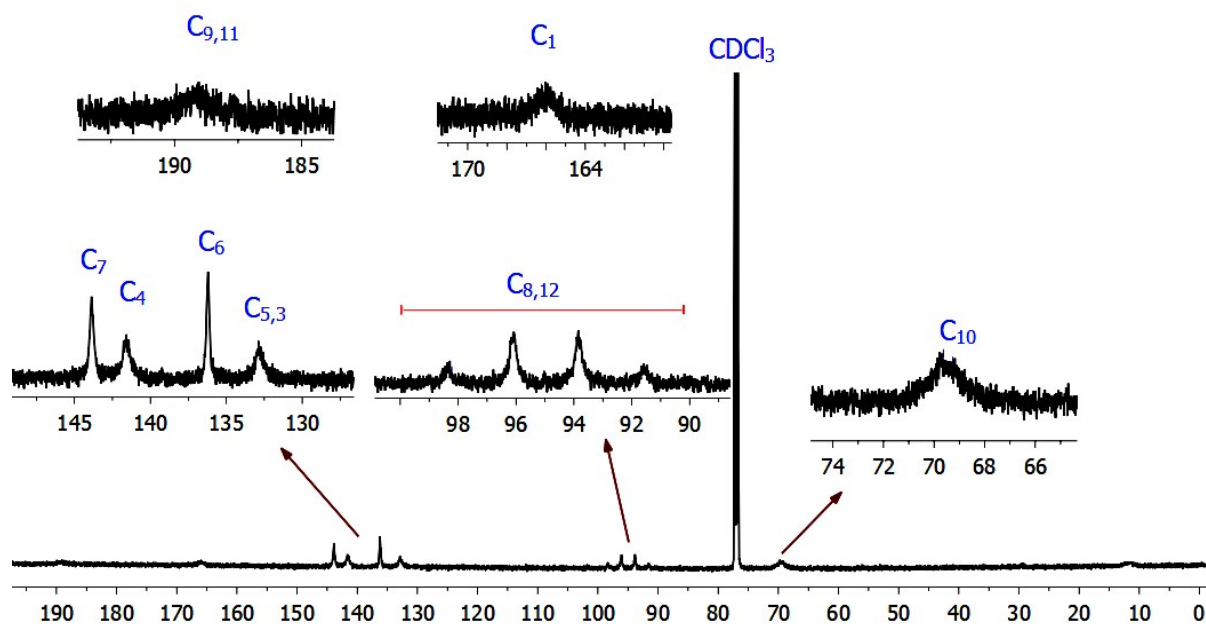

**Figure S3.**  $^{13}\text{C}$  NMR spectrum of the Yb complex.

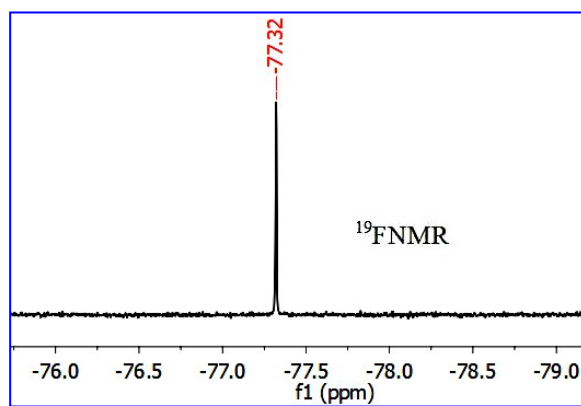

**Figure S4.**  $^{19}\text{F}$  NMR spectrum of the Yb complex.

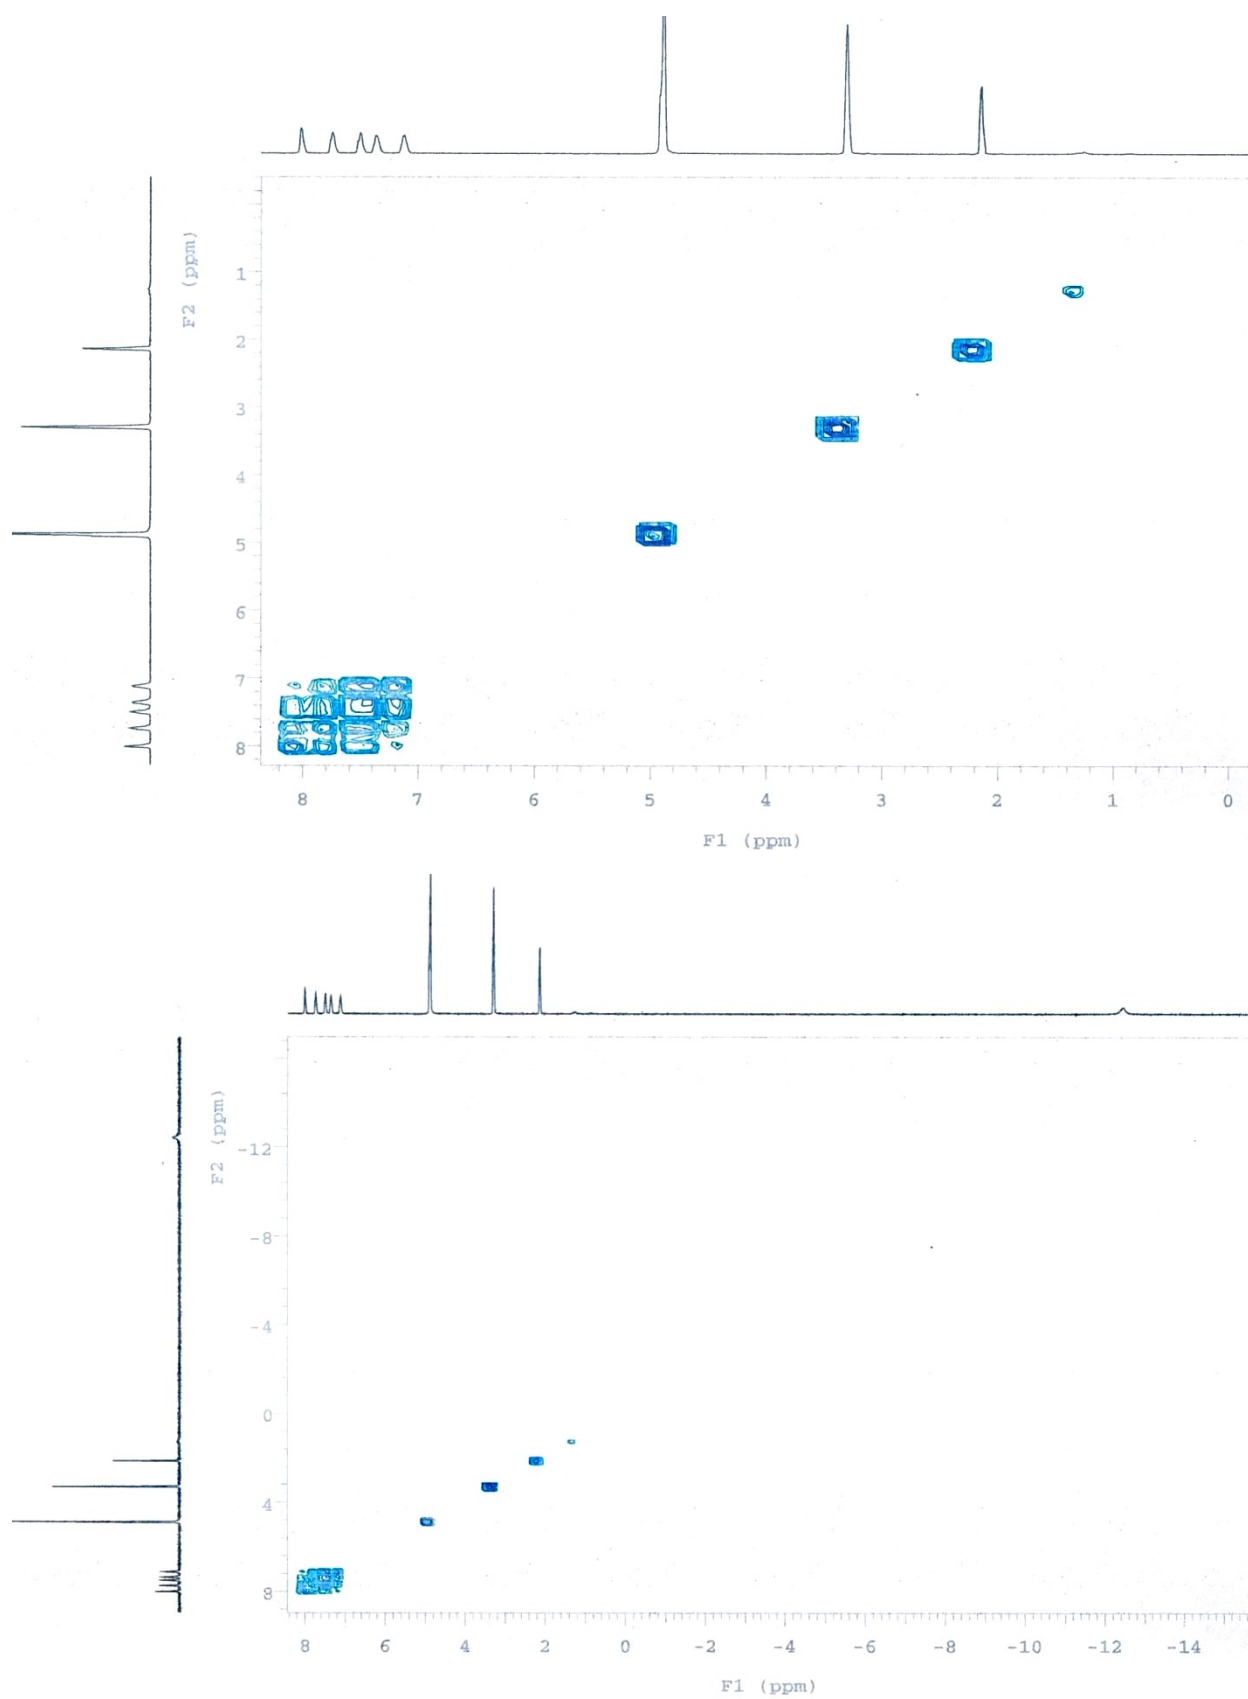

**Figure S5.** COSY NMR spectra of the Yb complex in methanol-d<sub>6</sub>.
